# Supplementary material for: Setting Research Priorities to Reduce Almost One Million Deaths from Birth Asphyxia by 2015
Source: PLoS Med. 2011 Jan 11;8(1):e1000389. doi: 10.1371/journal.pmed.1000389 (PMC3019109; doi:10.1371/journal.pmed.1000389)
Supplement: Table S2 — CHNRI's starting framework from which a listing of many research options (level of 3–5-year research program) and research questions (level of individual research papers) were being proposed by technical experts to develop a consolidated list of research questions. (0.02 MB PDF) [file pmed.1000389.s002.pdf]

**Table S2:** CHNRI's starting framework from which listing of many research options (level of 3-5-year research program) and research questions (level of individual research papers) were being proposed by technical experts to develop a consolidated list of research questions.

| RESEARCH INSTRUMENT                                         | RESEARCH AVENUE                                             | RESEARCH OPTION                                                                                                                                                                                                                                            | RESEARCH QUESTION                                                                                                                                                                                                                                                                                          |
|-------------------------------------------------------------|-------------------------------------------------------------|------------------------------------------------------------------------------------------------------------------------------------------------------------------------------------------------------------------------------------------------------------|------------------------------------------------------------------------------------------------------------------------------------------------------------------------------------------------------------------------------------------------------------------------------------------------------------|
| Epidemiological research                                    | Measuring the burden                                        | (Technical experts were invited to use categorization of research avenues and instruments to systematically propose a number of 'research options' within each of the avenues; 'research options' correspond to the level of 3-to-5-year research program) | (Technical experts were invited to propose a number of very specific 'research questions', corresponding to the title of individual research papers, within each of the 'research avenues'; eventually, after consolidation and removing of duplicate ideas, 154 such questions were retained for scoring) |
|                                                             | Understanding risk factors                                  |                                                                                                                                                                                                                                                            |                                                                                                                                                                                                                                                                                                            |
|                                                             | Evaluating the existing interventions                       |                                                                                                                                                                                                                                                            |                                                                                                                                                                                                                                                                                                            |
| Health policy and systems research ("DELIVERY")             | Studying capacity to reduce exposure to proven health risks |                                                                                                                                                                                                                                                            |                                                                                                                                                                                                                                                                                                            |
|                                                             | Studying capacity to deliver efficacious interventions      |                                                                                                                                                                                                                                                            |                                                                                                                                                                                                                                                                                                            |
| Research to improve existing interventions ("DEVELOPMENT")  | Research to improve deliverability                          |                                                                                                                                                                                                                                                            |                                                                                                                                                                                                                                                                                                            |
|                                                             | Research to improve affordability                           |                                                                                                                                                                                                                                                            |                                                                                                                                                                                                                                                                                                            |
|                                                             | Research to improve sustainability                          |                                                                                                                                                                                                                                                            |                                                                                                                                                                                                                                                                                                            |
| Research for development of new interventions ("DISCOVERY") | Basic research                                              |                                                                                                                                                                                                                                                            |                                                                                                                                                                                                                                                                                                            |
|                                                             | Clinical research                                           |                                                                                                                                                                                                                                                            |                                                                                                                                                                                                                                                                                                            |
|                                                             | Public health research                                      |                                                                                                                                                                                                                                                            |                                                                                                                                                                                                                                                                                                            |
